# Supplementary material for: Current Oncology Nutrition Care Practice in Southeast Asia: A Scoping Review
Source: MDPI journal article supplement (doi:10.3390/nu16101427), 2024-05-09
Supplement: s1 [file s1]

## Supplementary Materials

**Table S1. Documentation of search strategies of published database**

| Date        | Database name, URL                                                                                                                                                                                                                                                                                           | Search strategies/words searched                                                                                                                                                                                                                                                                                                                                                                                                                                                                                                                                                                                                                                                                                                                                                                                                                                                                                                                                                                                                                                                                                                                                                     | # of items retrieved | # of items screened (uploaded to Endnote) |
|-------------|--------------------------------------------------------------------------------------------------------------------------------------------------------------------------------------------------------------------------------------------------------------------------------------------------------------|--------------------------------------------------------------------------------------------------------------------------------------------------------------------------------------------------------------------------------------------------------------------------------------------------------------------------------------------------------------------------------------------------------------------------------------------------------------------------------------------------------------------------------------------------------------------------------------------------------------------------------------------------------------------------------------------------------------------------------------------------------------------------------------------------------------------------------------------------------------------------------------------------------------------------------------------------------------------------------------------------------------------------------------------------------------------------------------------------------------------------------------------------------------------------------------|----------------------|-------------------------------------------|
| 17/Aug/2023 | OVID MEDLINE(R)<br>1946 TO AUGUST 15,<br>2023<br><a href="https://ovidsp.dc1.ovid.com/ovid-new-a/ovidweb.cgi?&amp;S=KHI CFPHOEHACJMCNKPJJ NHOIIMAAA00&amp;DB+List=1&amp;Cancel=1">https://ovidsp.dc1.ovid.com/ovid-new-a/ovidweb.cgi?&amp;S=KHI CFPHOEHACJMCNKPJJ NHOIIMAAA00&amp;DB+List=1&amp;Cancel=1</a> | #1 Nutritionists/<br>#2 Dietetics/<br>#3 Dietary Services/<br>#4 nutrition*.mp.<br>#5 (dietitian* or dietician* or dietetic*).mp.<br>#6 or/1-5<br>#7 exp Asia, Southeastern/<br>#8 Asia, Southeastern/ or Borneo/ or Brunei/ or Cambodia/ or Indochina/ or Indonesia/ or Laos/ or Malaysia/ or Mekong Valley/ or Myanmar/ or Philippines/ or Singapore/ or Thailand/ or Timor-Leste/ or Vietnam/<br>#9 (Southeast* Asia or South-east* Asia* or Borneo* or Brunei or Cambodia* or Indochin* or Indo-chin* or Indonesia* or Lao* or Malaysia* or Mekong Valley or Myanmar or Philippin* or Singapor* or Thai* Timor-Leste or Vietnam*).mp<br>#10 (Southeast* Asia or South-east* Asia* or Borneo* or Brunei or Cambodia* or Indochin* or Indo-chin* or Indonesia* or Lao* or Malaysia* or Mekong Valley or Myanmar or Philippin* or Singapor* or Thai* Timor-Leste or Vietnam*).cp.<br>#11 or/7-10<br>#12 medical oncology/ or radiation oncology/ or surgical oncology/<br>#13 Cancer Care Facilities/<br>#14 Oncology Service, Hospital/<br>#15 exp Neoplasms/<br>#16 cancer*.mp.<br>#17 oncolog*.mp.<br>#18 neoplasm*.mp.<br>#19 kanker.mp.<br>#20 or/12-19<br>#21 6 and 11 and 20 | 259                  | 259                                       |
| 17/Aug/2023 | GLOBAL HEALTH 1910<br>TO 2023 WEEK 32<br><a href="https://ovidsp.dc1.ovid.com/ovid-new-a/ovidweb.cgi?&amp;S=KHI CFPHOEHACJMCNKPJJ NHOIIMAAA00&amp;New">https://ovidsp.dc1.ovid.com/ovid-new-a/ovidweb.cgi?&amp;S=KHI CFPHOEHACJMCNKPJJ NHOIIMAAA00&amp;New</a>                                               | #1 dietitians/ or dietetics/<br>#2 nutritionists/<br>#3 nutrition*.mp.<br>#4 (dietitian* or dietician* or dietetic*).mp<br>#5 or/1-4<br>#6 exp south east asia/                                                                                                                                                                                                                                                                                                                                                                                                                                                                                                                                                                                                                                                                                                                                                                                                                                                                                                                                                                                                                      | 1454                 | 1454                                      |

| Date        | Database name, URL                                                                                                                                                                                                                                                                                        | Search strategies/words searched                                                                                                                                                                                                                                                                                                                                                                                                                                                                                                                                                                                                                                                                                                                                                                                                                                                                                                                 | # of items retrieved | # of items screened (uploaded to Endnote) |
|-------------|-----------------------------------------------------------------------------------------------------------------------------------------------------------------------------------------------------------------------------------------------------------------------------------------------------------|--------------------------------------------------------------------------------------------------------------------------------------------------------------------------------------------------------------------------------------------------------------------------------------------------------------------------------------------------------------------------------------------------------------------------------------------------------------------------------------------------------------------------------------------------------------------------------------------------------------------------------------------------------------------------------------------------------------------------------------------------------------------------------------------------------------------------------------------------------------------------------------------------------------------------------------------------|----------------------|-------------------------------------------|
|             | +Database=Single%7c19                                                                                                                                                                                                                                                                                     | <p>#7 (Southeast* Asia or South-east* Asia* or Borneo* or Brunei or Cambodia* or Indochin* or Indo-chin* or Indonesia* or Lao* or Malaysia* or Mekong Valley or Myanmar or Philippin* or Singapor* or Thai* Timor-Leste or Vietnam*).mp.</p> <p>#8 (Southeast* Asia or South-east* Asia* or Borneo* or Brunei or Cambodia* or Indochin* or Indo-chin* or Indonesia* or Lao* or Malaysia* or Mekong Valley or Myanmar or Philippin* or Singapor* or Thai* Timor-Leste or Vietnam*).cp.gl.</p> <p>#9 or/6-8</p> <p>#10 exp neoplasms/</p> <p>#11 cancer/</p> <p>#12 cancer*.mp.</p> <p>#13 oncolog*.mp.</p> <p>#14 neoplasm*.mp.</p> <p>#15 kanker.mp.</p> <p>#16 or/10-15</p> <p>#17 5 and 9 and 16</p>                                                                                                                                                                                                                                           |                      |                                           |
| 17/Aug/2023 | EBM REVIEWS-COCHRANE CENTRAL REGISTER OF CONTROLLED TRIALS JULY 2023<br><a href="https://ovidsp.dc1.ovid.com/ovid-new-a/ovidweb.cgi?&amp;S=KHCNKPJJNHOIKMAAA00&amp;New+Database=Single%7c6">https://ovidsp.dc1.ovid.com/ovid-new-a/ovidweb.cgi?&amp;S=KHCNKPJJNHOIKMAAA00&amp;New+Database=Single%7c6</a> | <p>#1 Nutritionists/</p> <p>#2 dietetics/</p> <p>#3 Dietary Services/</p> <p>#4 nutrition*.mp.</p> <p>#5 (dietitian* or dietician* or dietetic*).mp.</p> <p>#6 or/1-5</p> <p>#7 exp Asia, Southeastern/</p> <p>#8 Asia, Southeastern/ or Borneo/ or Brunei/ or Cambodia/ or Indochina/ or Indonesia/ or Laos/ or Malaysia/ or Mekong valley/ or Myanmar/ or Philippines/ or Singapore/ or Thailand/ or timor-leste/ or Vietnam/</p> <p>#9 (Southeast* Asia or South-east* Asia* or Borneo* or Brunei or Cambodia* or Indochin* or Indo-chin* or Indonesia* or Lao* or Malaysia* or Mekong Valley or Myanmar or Philippin* or Singapor* or Thai* Timor-Leste or Vietnam*).mp.</p> <p>#10 (Southeast* Asia or South-east* Asia* or Borneo* or Brunei or Cambodia* or Indochin* or Indo-chin* or Indonesia* or Lao* or Malaysia* or Mekong Valley or Myanmar or Philippin* or Singapor* or Thai* Timor-Leste or Vietnam*).cp</p> <p>#11 or/7-10</p> | 36                   | 36                                        |

| Date        | Database name, URL                                                                                                                                                                                                                                                                           | Search strategies/words searched                                                                                                                                                                                                                                                                                                                                                                                                                                                                                                                                                                                                                                                                                                                                                                                                                                                        | # of items retrieved | # of items screened (uploaded to Endnote) |
|-------------|----------------------------------------------------------------------------------------------------------------------------------------------------------------------------------------------------------------------------------------------------------------------------------------------|-----------------------------------------------------------------------------------------------------------------------------------------------------------------------------------------------------------------------------------------------------------------------------------------------------------------------------------------------------------------------------------------------------------------------------------------------------------------------------------------------------------------------------------------------------------------------------------------------------------------------------------------------------------------------------------------------------------------------------------------------------------------------------------------------------------------------------------------------------------------------------------------|----------------------|-------------------------------------------|
|             |                                                                                                                                                                                                                                                                                              | #12 medical oncology/ or radiation oncology/ or surgical oncology/<br>#13 Cancer Care Facilities/<br>#14 Oncology Service, Hospital/<br>#15 exp Neoplasms/<br>#16 cancer*.mp.<br>#17 oncolog*.mp.<br>#18 neoplasm*.mp.<br>#19 kanker.mp.<br>#20 or/12-19<br>#21 6 and 11 and 20                                                                                                                                                                                                                                                                                                                                                                                                                                                                                                                                                                                                         |                      |                                           |
| 17/Aug/2023 | EMBASE<br>CLASSIC+EMBASE<br>1947 TO 2023<br>AUGUST 15<br><a href="https://ovidsp.dc1.ovid.com/ovid-new-a/ovidweb.cgi?&amp;S=KHCNKPJJNHOIIMAAA00&amp;New+Database=Single%7c17">https://ovidsp.dc1.ovid.com/ovid-new-a/ovidweb.cgi?&amp;S=KHCNKPJJNHOIIMAAA00&amp;New+Database=Single%7c17</a> | #1 Dietitian/<br>#2 Dietetics/<br>#3 Dietary Service/<br>#4 nutrition*.mp.<br>#5 (dietitian* or dietician* or dietetic*).mp<br>#6 or/1-5<br>#7 exp Southeast Asia/<br>#8 (Southeast* Asia or South-east* Asia* or Borneo* or Brunei or Cambodia* or Indochin* or Indo-chin* or Indonesia* or Lao* or Malaysia* or Mekong Valley or Myanmar or Philippin* or Singapor* or Thai* Timor-Leste or Vietnam*).mp.<br>#9 (Southeast* Asia or South-east* Asia* or Borneo* or Brunei or Cambodia* or Indochin* or Indo-chin* or Indonesia* or Lao* or Malaysia* or Mekong Valley or Myanmar or Philippin* or Singapor* or Thai* Timor-Leste or Vietnam*).cp.<br>#10 or/7-9<br>#11 medical oncology/<br>#12 exp Neoplasms/<br>#13 malignant neoplasm/<br>#14 cancer center/<br>#15 cancer*.mp.<br>#16 neoplasm*.mp.<br>#17 kanker.mp.<br>#18 oncology.mp.<br>#19 or/11-18<br>#20 6 and 10 and 19 | 679                  | 679                                       |
| 17/Aug/2023 | PROQUEST<br><a href="https://www.proquest.com/advanced?accountid=12528">https://www.proquest.com/advanced?accountid=12528</a>                                                                                                                                                                | #1 dietitians (MeSH) OR nutritionist (MeSH) OR nutrition (MeSH)<br>#2 dietitian* OR dietician* OR dietetic* OR nutrition*<br>#3 OR/1-2<br>#4 Asian people (MeSH)                                                                                                                                                                                                                                                                                                                                                                                                                                                                                                                                                                                                                                                                                                                        | 1794                 | 1794                                      |

| Date | Database name, URL | Search strategies/words searched                                                                                                                                                                                                                                                                                                                                                                                                                                                                                                                                                                                                                                                                                                                                                                                                                                                                                                                                                                                                                                                                                                                                                                                                                                                                                                                                                    | # of items retrieved | # of items screened (uploaded to Endnote) |
|------|--------------------|-------------------------------------------------------------------------------------------------------------------------------------------------------------------------------------------------------------------------------------------------------------------------------------------------------------------------------------------------------------------------------------------------------------------------------------------------------------------------------------------------------------------------------------------------------------------------------------------------------------------------------------------------------------------------------------------------------------------------------------------------------------------------------------------------------------------------------------------------------------------------------------------------------------------------------------------------------------------------------------------------------------------------------------------------------------------------------------------------------------------------------------------------------------------------------------------------------------------------------------------------------------------------------------------------------------------------------------------------------------------------------------|----------------------|-------------------------------------------|
|      |                    | <p>#5 Southeast* Asia* OR South-east* Asia* OR Borneo* OR Brunei OR Cambodia* OR Indochin* OR Indo-chin* OR Indonesia* OR Lao* OR Malaysia* OR Mekong Valley OR Myanmar OR Philippin* OR Singapor* OR Thai* OR Timor-Leste OR Vietnam*</p> <p>#6 OR/4-5</p> <p>#7 Oncology (MeSH) OR Cancer therapies (MeSH) OR Tumors (MeSH) OR Cancer (MeSH) OR Cancer surgeries (MeSH) OR radiation therapy (MeSH) OR chemotherapy (MeSH)</p> <p>#8 cancer* OR oncolog* OR neoplasm* OR kanker</p> <p>#9 OR/7-8</p> <p>#10 3 AND 6 AND 9</p> <p>Final Search:<br/>           ((MAINSUBJECT.EXACT("Dietitians") OR MAINSUBJECT.EXACT("Nutritionists") OR MAINSUBJECT.EXACT("Nutrition")) OR noft(dietitian* OR dietician* OR dietetic* OR nutrition*)) AND<br/>           (MAINSUBJECT.EXACT("Asian people") OR noft(Southeast* Asia* OR South-east* Asia* OR Borneo* OR Brunei OR Cambodia* OR Indochin* OR Indo-chin* OR Indonesia* OR Lao* OR Malaysia* OR Mekong Valley OR Myanmar OR Philippin* OR Singapor* OR Thai* OR Timor-Leste OR Vietnam*)) AND<br/>           ((MAINSUBJECT.EXACT("Oncology") OR MAINSUBJECT.EXACT("Cancer therapies") OR MAINSUBJECT.EXACT("Tumors") OR MAINSUBJECT.EXACT("Cancer") OR MAINSUBJECT.EXACT("Cancer surgery") OR MAINSUBJECT.EXACT("Radiation therapy") OR MAINSUBJECT.EXACT("Chemotherapy")) OR noft(cancer* OR oncolog* OR neoplasm* OR kanker))</p> |                      |                                           |

**Table S2. Documentation of search strategy for grey literature database**

| Date        | Database name, URL                                                                                                                                                               | Search strategies/words searched                                                                                                                                      | # of items retrieved | # of items screened (uploaded to Endnote) |
|-------------|----------------------------------------------------------------------------------------------------------------------------------------------------------------------------------|-----------------------------------------------------------------------------------------------------------------------------------------------------------------------|----------------------|-------------------------------------------|
| 17/Aug/2023 | Proquest Dissertation & Theses Global<br><a href="https://www.proquest.com/pqdtglobal/advanced?accountid=12528">https://www.proquest.com/pqdtglobal/advanced?accountid=12528</a> | <p>#1 dietitians (subject heading) OR nutritionist (subject heading) OR nutrition (subject heading)</p> <p>#2 dietitian* OR dietician* OR dietetic* OR nutrition*</p> | 36                   | 36                                        |

| Date | Database name, URL | Search strategies/words searched                                                                                                                                                                                                                                                                                                                                                                                                                                                                                                                                                                                                                                                                                                                                                                                                                                                                                                                                                                                                                                                                                                                                                                                                                                                                                                                                                                                                                                                                                           | # of items retrieved | # of items screened (uploaded to Endnote) |
|------|--------------------|----------------------------------------------------------------------------------------------------------------------------------------------------------------------------------------------------------------------------------------------------------------------------------------------------------------------------------------------------------------------------------------------------------------------------------------------------------------------------------------------------------------------------------------------------------------------------------------------------------------------------------------------------------------------------------------------------------------------------------------------------------------------------------------------------------------------------------------------------------------------------------------------------------------------------------------------------------------------------------------------------------------------------------------------------------------------------------------------------------------------------------------------------------------------------------------------------------------------------------------------------------------------------------------------------------------------------------------------------------------------------------------------------------------------------------------------------------------------------------------------------------------------------|----------------------|-------------------------------------------|
|      |                    | <p>#3 OR/1-2</p> <p>#4 Asian people (subject heading)</p> <p>#5 Southeast* Asia* OR South-east* Asia* OR Borneo* OR Brunei OR Cambodia* OR Indochin* OR Indo-chin* OR Indonesia* OR Lao* OR Malaysia* OR Mekong Valley OR Myanmar OR Philippin* OR Singapor* OR Thai* OR Timor-Leste OR Vietnam*</p> <p>#6 OR/4-5</p> <p>#7 Oncology (subject heading) OR Cancer therapies (subject heading) OR Tumors (subject heading) OR Cancer (subject heading) OR Cancer surgeries (subject heading) OR radiation therapy (subject heading) OR chemotherapy (subject heading)</p> <p>#8 cancer* OR oncolog* OR neoplasm* OR kanker</p> <p>#9 OR/7-8</p> <p>#10 3 AND 6 AND 9</p> <p>Final Search:<br/>           ((MAINSUBJECT.EXACT("Dietitians") OR MAINSUBJECT.EXACT("Nutritionists") OR MAINSUBJECT.EXACT("Nutrition")) OR noft(dietitian* OR dietician* OR dietetic* OR nutrition*)) AND<br/>           (MAINSUBJECT.EXACT("Asian people") OR noft(Southeast* Asia* OR South-east* Asia* OR Borneo* OR Brunei OR Cambodia* OR Indochin* OR Indo-chin* OR Indonesia* OR Lao* OR Malaysia* OR Mekong Valley OR Myanmar OR Philippin* OR Singapor* OR Thai* OR Timor-Leste OR Vietnam*)) AND<br/>           ((MAINSUBJECT.EXACT("Oncology") OR MAINSUBJECT.EXACT("Cancer therapies") OR MAINSUBJECT.EXACT("Tumors") OR MAINSUBJECT.EXACT("Cancer") OR MAINSUBJECT.EXACT("Cancer surgery") OR MAINSUBJECT.EXACT("Radiation therapy") OR MAINSUBJECT.EXACT("Chemotherapy")) OR noft(cancer* OR oncolog* OR neoplasm* OR kanker))</p> |                      |                                           |

**Table S3. Documentation of search strategy for grey literature: targeted website (nutrition association in Southeast Asia)**

| Date        | Organisation name                                                           | URL                                                                   | # of items screened |
|-------------|-----------------------------------------------------------------------------|-----------------------------------------------------------------------|---------------------|
| 12/Sep/2023 | Indonesian Nutritionist Association (Persatuan Ahli Gizi Indonesia/Persagi) | <a href="https://portal.persagi.org/">https://portal.persagi.org/</a> | 0                   |

| <b>Date</b> | <b>Organisation name</b>                                             | <b>URL</b>                                                                                | <b># of items screened</b> |
|-------------|----------------------------------------------------------------------|-------------------------------------------------------------------------------------------|----------------------------|
| 12/Sep/2023 | Indonesian Dietitian Association (Asosiasi Dietisien Indonesia/AsDI) | <a href="https://ppasdi.com/">https://ppasdi.com/</a>                                     | 0                          |
| 12/Sep/2023 | Malaysia Dietetic Association                                        | <a href="https://www.dietitians.org.my/">https://www.dietitians.org.my/</a>               | 0                          |
| 12/Sep/2023 | Nutrition Society of Malaysia                                        | <a href="https://nutriweb.org.my/">https://nutriweb.org.my/</a>                           | 0                          |
| 12/Sep/2023 | Nutrition Association of Thailand                                    | <a href="https://www.nutritionthailand.org/en/">https://www.nutritionthailand.org/en/</a> | 0                          |
| 12/Sep/2023 | Singapore Nutrition & Dietetic Association                           | <a href="https://snda.org.sg/">https://snda.org.sg/</a>                                   | 0                          |
| 12/Sep/2023 | Myanmar Nutrition & Dietetic Association                             | <a href="https://mmnda.org/">https://mmnda.org/</a>                                       | 0                          |
| 12/Sep/2023 | Nutritionists-Dietitians Associations of the Philippines             | <a href="https://ndap.org.ph/">https://ndap.org.ph/</a>                                   | 0                          |
| 12/Sep/2023 | Philippine Society of Nutritionists-dietitians                       | <a href="https://psnd.org.ph/">https://psnd.org.ph/</a>                                   | 0                          |

**Table S4. Documentation of search strategy for grey literature: contact knowledge expert**

| <b>Date contacted</b> | <b>Name of individual</b>                                                                                                                       | <b># of items recommended</b> | <b># of items identified for full screening</b> |
|-----------------------|-------------------------------------------------------------------------------------------------------------------------------------------------|-------------------------------|-------------------------------------------------|
| 20/Jul/2023           | Fitri Hudayani, S.ST., S.Gz., M.K.M., R.D.<br>Head at the central level of the Indonesian Dietitians Association (Asosiasi Dietisien Indonesia) | 3                             | 0                                               |
